# Supplementary material for: The natural history of de novo donor-specific HLA antibodies after kidney transplantation
Source: PubMed Central journal article supplement (PMC9523126; doi:10.3389/fmed.2022.943502), 2022-09-16
Supplement: Data_Sheet_1.pdf [file Data_Sheet_1.pdf]

## Supplementary Material

### **Supplementary Figure 1. Survival analysis of death-censored graft failure in patients with dnDSA and without dnDSA ('Control group').**

Patients with dnDSA of our study (n=400) had significantly lower graft survival after transplantation (Log rank  $p < 0.001$ ) compared to the 'Control group' \*.

\*'Control group': n=2752 patients without dnDSA (and without preformed DSA) in the same follow-up period of our study.

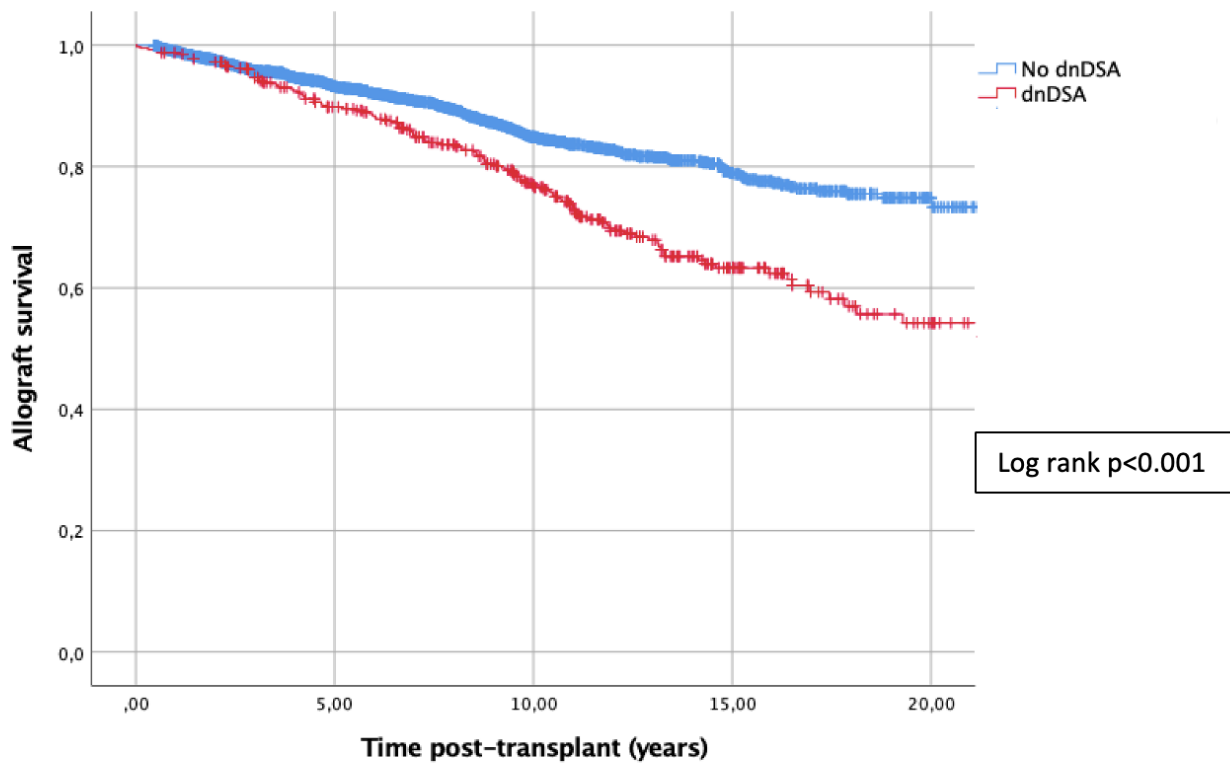

**Supplementary Figure 2. Time to first occurrence of first dnDSA in 400 patients.**

Median time from transplant to first occurrence of first dnDSA: 3.4 years (IQR: 1.3 - 7.3).

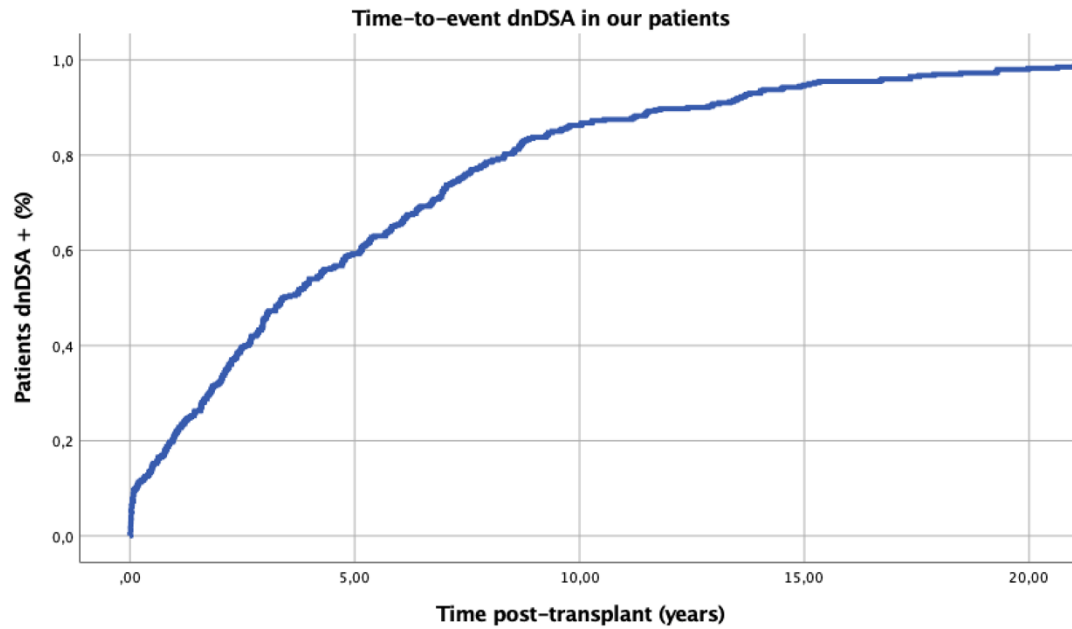

**Supplementary Figure 3. Time to occurrence of another dnDSA (next dnDSA) after transplant in 174 patients with >1 dnDSA.**

Median time from transplant to next dnDSA ( $\geq 1$ ): 3.0 years (IQR: 1.3 - 7.1).

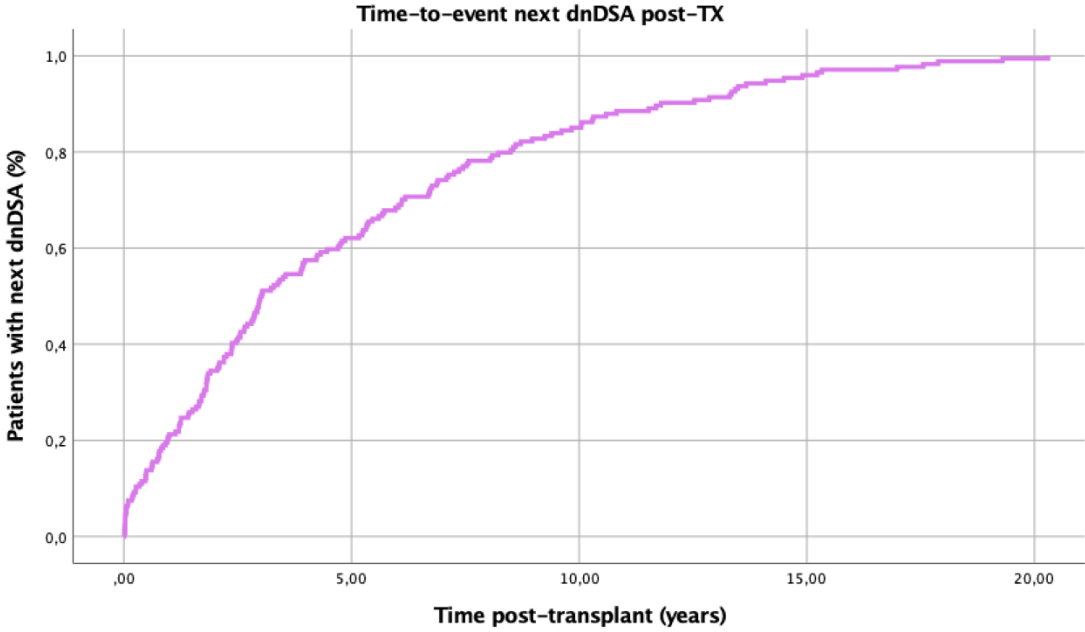

**Supplementary Figure 4. Time to occurrence of another dnDSA (next dnDSA) from first occurrence of first dnDSA in 174 patients with >1 dnDSA.**

Median time from first occurrence of first ( $\geq 1$ ) dnDSA to next first appearance of another ( $\geq 1$ ) dnDSA: 0.0 years (IQR 0.0 - 0.4).

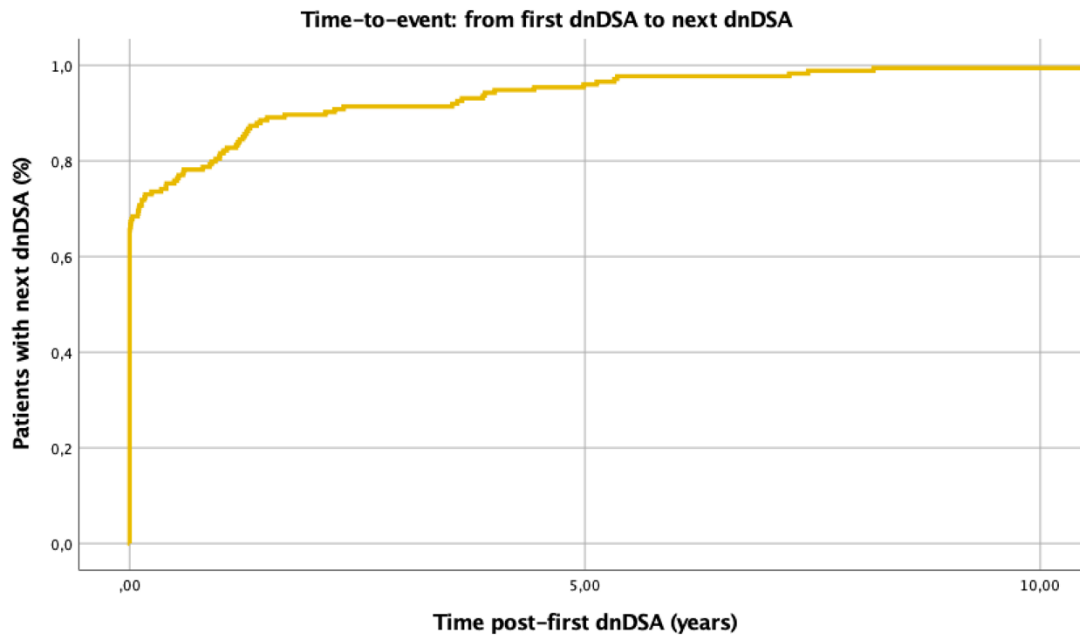

**Supplementary Figure 5. Time to antibody-mediated rejection (ABMR) from first occurrence of first dnDSA in 99 patients.**

Median time from first occurrence of first dnDSA to ABMR: 0.6 years (IQR: 0.0 - 2.5)

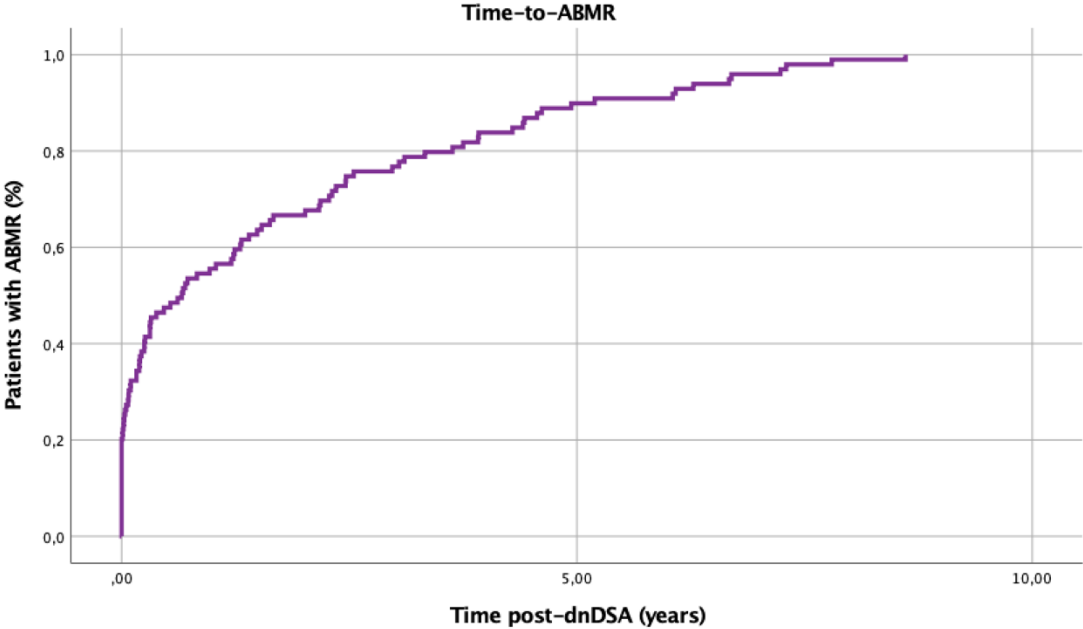

**Supplementary Figure 6. Survival analysis of death-censored graft failure and TCMR.**

- 1) Those patients with at least one episode of TCMR had significantly lower graft survival after transplantation (Log rank  $p < 0.001$ ).

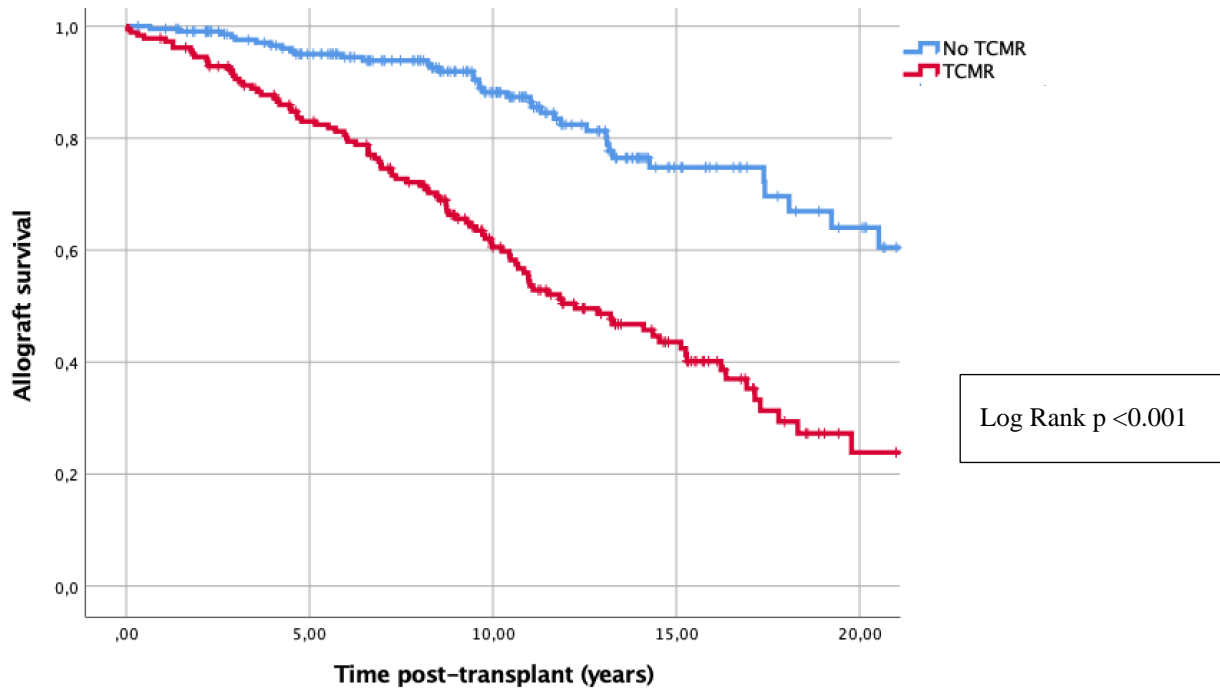

- 2) Those patients with at least one episode of TCMR had significantly lower graft survival after dnDSA appearance (Log rank  $p < 0.001$ ).

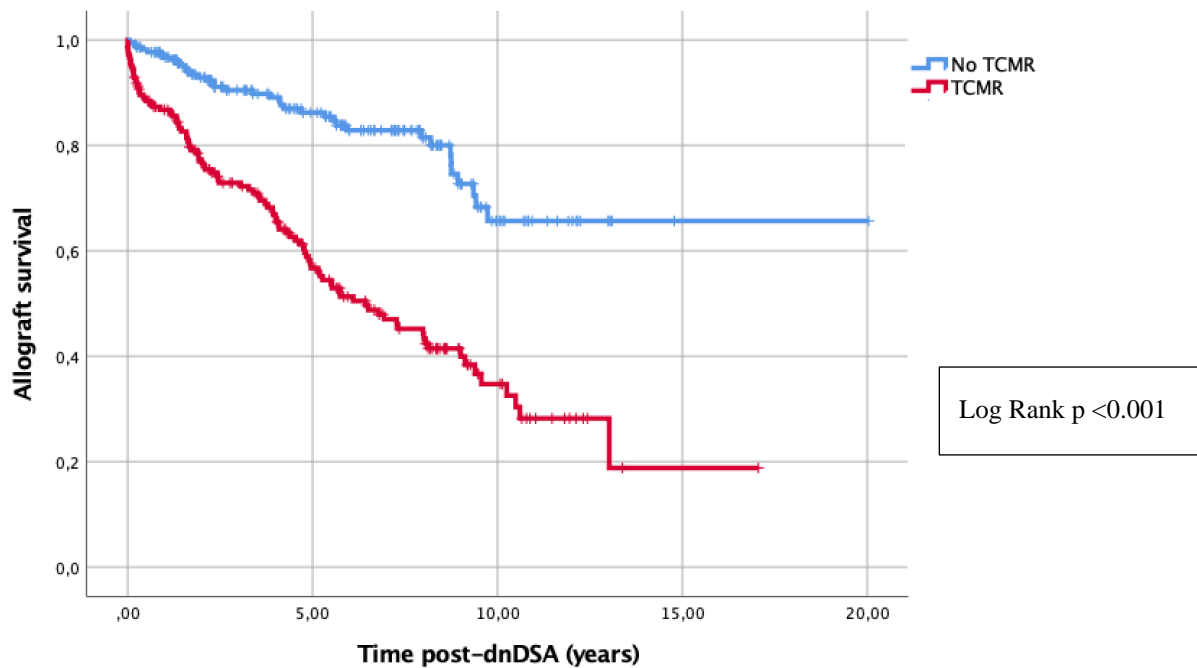

**Supplementary Figure 7. Survival analysis of death-censored graft failure and ABMR**

- 1) Those patients with at least one episode of ABMR had significantly lower graft survival after transplantation (Log rank  $p < 0.001$ ).

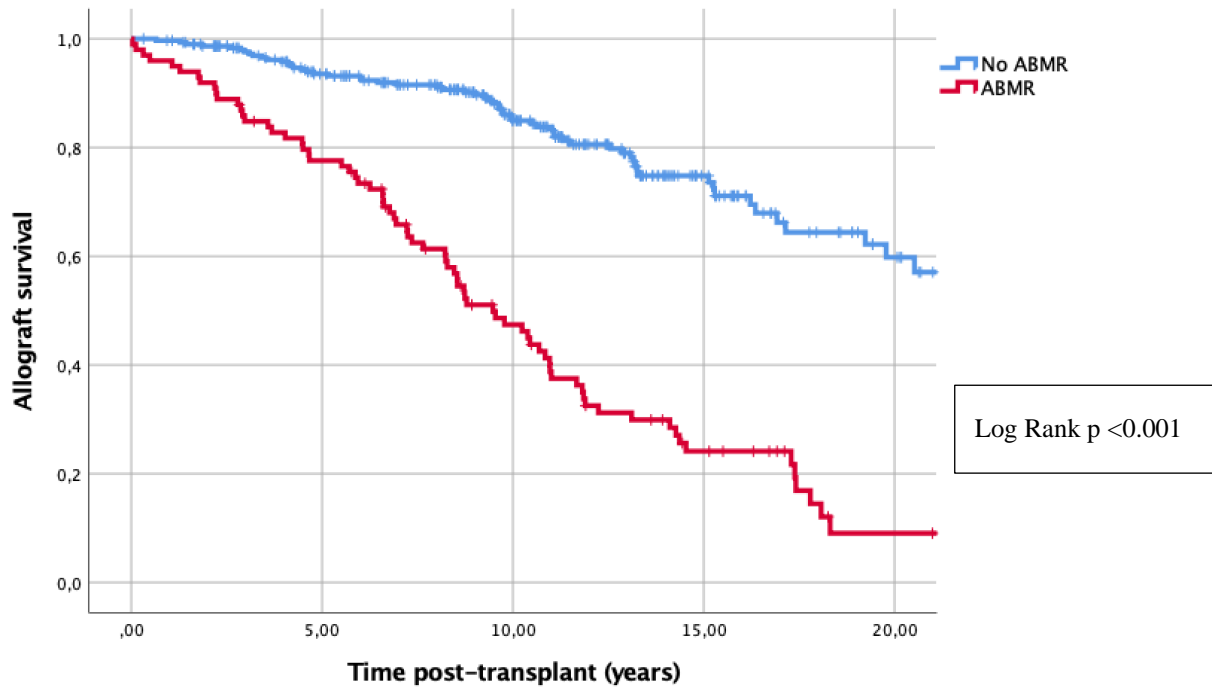

- 2) Those patients with at least one episode of ABMR had significantly lower graft survival after dnDSA appearance (Log rank  $p < 0.001$ ).

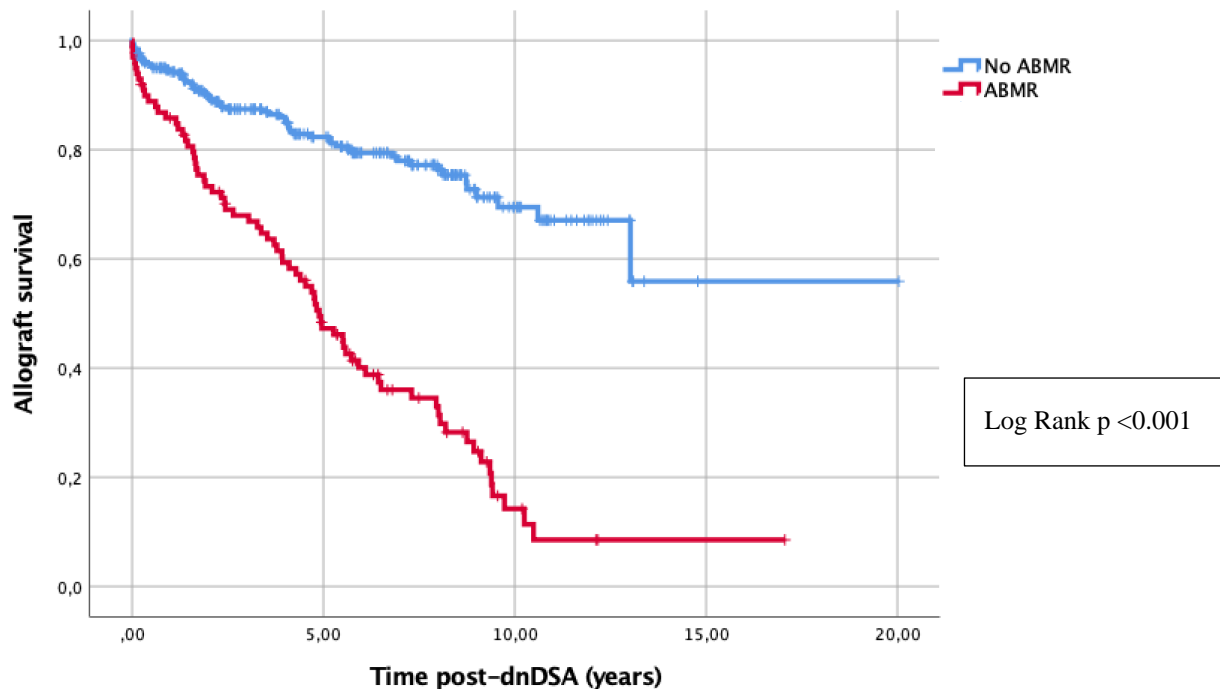

**Supplementary Figure 8. Time to class I and class II dnDSA in 731 dnDSA.**

No significant differences between time to class I and II dnDSA (log rank  $p=0.077$ ).

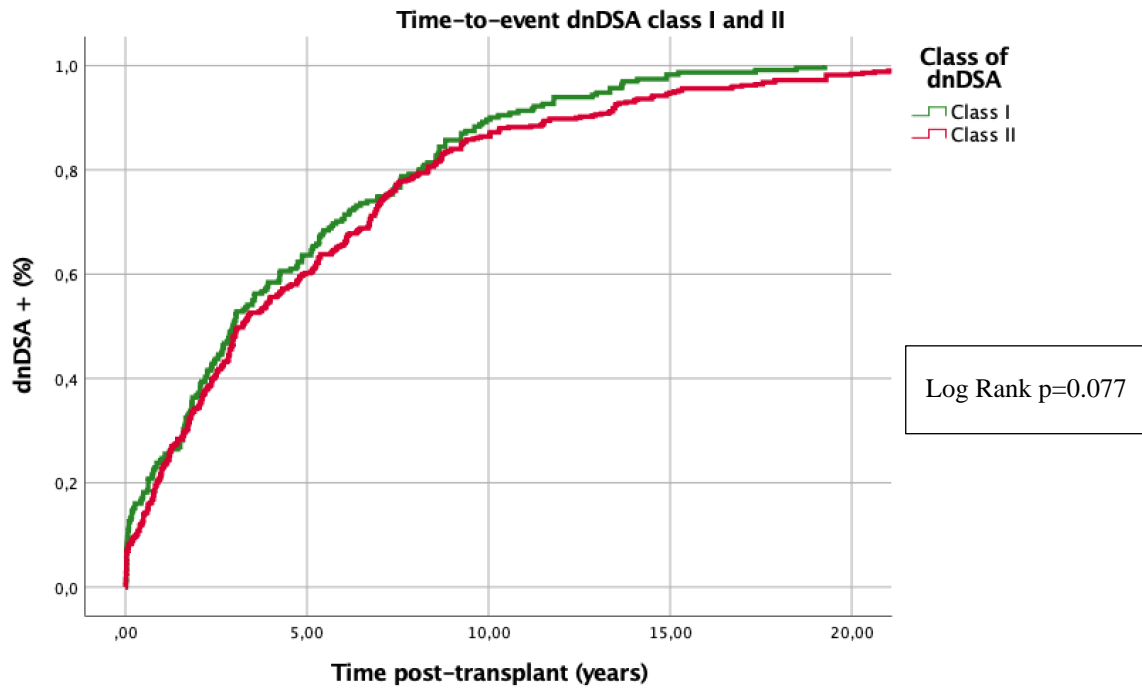



**Supplementary Table 1. Observed data, last observation carried forward (LOCF) analysis and multiple imputation (MI) of estimated glomerular filtration rate - eGFR - values (ml/min) before and after first occurrence of first dnDSA.**

|                                                                  |                                |                                |                                                |                                |                                 |                                 |                                |
|------------------------------------------------------------------|--------------------------------|--------------------------------|------------------------------------------------|--------------------------------|---------------------------------|---------------------------------|--------------------------------|
| <u>Time (months)</u>                                             | <u>-24mo</u><br><u>(n=147)</u> | <u>-12mo</u><br><u>(n=174)</u> | <u>First</u><br><u>dnDSA</u><br><u>(n=306)</u> | <u>+12mo</u><br><u>(n=235)</u> | <u>+24mo</u><br><u>(n=175)</u>  | <u>+36mo</u><br><u>(n=234)</u>  | <u>+48mo</u><br><u>(n=211)</u> |
| <u>Observed data</u><br><u>(Median values,</u><br><u>ml/min)</u> | 48.0                           | 46.0                           | 41.0                                           | 42.0                           | 41.0                            | 41.5                            | 41.0                           |
|                                                                  | <u>-24mo</u><br><u>(n=147)</u> | <u>-12mo</u><br><u>(n=174)</u> | <u>First</u><br><u>dnDSA</u><br><u>(n=306)</u> | <u>+12mo</u><br><u>(n=324)</u> | <u>+24mo</u><br><u>(n=336)</u>  | <u>+36mo</u><br><u>(n=267)</u>  | <u>+48mo</u><br><u>(n=276)</u> |
| <u>LOCF</u><br><u>(Median values,</u><br><u>ml/min)</u>          | 48.0                           | 46.0                           | 41.0                                           | 41.0                           | 40.0                            | 41.0                            | 40.5                           |
|                                                                  | <u>-24mo</u><br><u>(n=147)</u> | <u>-12mo</u><br><u>(n=174)</u> | <u>First</u><br><u>dnDSA</u><br><u>(n=306)</u> | <u>+12mo</u><br><u>(n=330)</u> | <u>+24mo</u><br><u>(n=330)</u>  | <u>+36mo</u><br><u>(n=330)</u>  | <u>+48mo</u><br><u>(n=330)</u> |
| <u>MI</u><br><u>(Median values,</u><br><u>ml/min)</u>            | 48.0                           | 46.0                           | 41.0                                           | 42.5                           | 41.3                            | 39.6                            | 38.2                           |
| <u>Time (months)</u>                                             | <u>+60mo</u><br><u>(n=192)</u> | <u>+72mo</u><br><u>(n=156)</u> | <u>+84mo</u><br><u>(n=121)</u>                 | <u>+96mo</u><br><u>(n=102)</u> | <u>+108mo</u><br><u>(n=65)</u>  | <u>+120mo</u><br><u>(n=37)</u>  |                                |
| <u>Observed data</u><br><u>(Median values,</u><br><u>ml/min)</u> | 41.0                           | 39.0                           | 38.0                                           | 32.5                           | 34.0                            | 41.0                            |                                |
|                                                                  | <u>+60mo</u><br><u>(n=281)</u> | <u>+72mo</u><br><u>(n=281)</u> | <u>+84mo</u><br><u>(n=282)</u>                 | <u>+96mo</u><br><u>(n=282)</u> | <u>+108mo</u><br><u>(n=284)</u> | <u>+120mo</u><br><u>(n=284)</u> |                                |
| <u>LOCF</u><br><u>(Median values,</u><br><u>ml/min)</u>          | 38.0                           | 35.0                           | 33.5                                           | 30.0                           | 30.0                            | 30.0                            |                                |
|                                                                  | <u>+60mo</u><br><u>(n=330)</u> | <u>+72mo</u><br><u>(n=330)</u> | <u>+84mo</u><br><u>(n=330)</u>                 | <u>+96mo</u><br><u>(n=330)</u> | <u>+108mo</u><br><u>(n=330)</u> | <u>+120mo</u><br><u>(n=330)</u> |                                |
| <u>MI</u><br><u>(Median values,</u><br><u>ml/min)</u>            | 37.2                           | 34.4                           | 34.0                                           | 30.9                           | 29.4                            | 29.1                            |                                |

**Supplementary Table 2. Observed data, last observation carried forward (LOCF) analysis and multiple imputation (MI) of proteinuria values (mg/g creatinine) before and after first occurrence of first dnDSA.**

| <u>Time (months)</u>                                                      | <u>-24mo</u><br><u>(n=144)</u> | <u>-12mo</u><br><u>(n=184)</u> | <u>First</u><br><u>dnDSA</u><br><u>(n=340)</u> | <u>+12mo</u><br><u>(n=212)</u> | <u>+24mo</u><br><u>(n=195)</u> | <u>+36mo</u><br><u>(n=159)</u> | <u>+48mo</u><br><u>(n=164)</u> | <u>+60mo</u><br><u>(n=166)</u> |
|---------------------------------------------------------------------------|--------------------------------|--------------------------------|------------------------------------------------|--------------------------------|--------------------------------|--------------------------------|--------------------------------|--------------------------------|
| <u>Observed data</u><br><u>(Median values,</u><br><u>mg/g creatinine)</u> | 174.0                          | 140.0                          | 182.0                                          | 153.0                          | 167.0                          | 184.0                          | 173.5                          | 181.0                          |
|                                                                           | <u>-24mo</u><br><u>(n=144)</u> | <u>-12mo</u><br><u>(n=184)</u> | <u>First</u><br><u>dnDSA</u><br><u>(n=340)</u> | <u>+12mo</u><br><u>(n=343)</u> | <u>+24mo</u><br><u>(n=347)</u> | <u>+36mo</u><br><u>(n=237)</u> | <u>+48mo</u><br><u>(n=246)</u> | <u>+60mo</u><br><u>(n=252)</u> |
| <u>LOCF</u><br><u>(Median values,</u><br><u>mg/g creatinine)</u>          | 174.0                          | 140.0                          | 182.0                                          | 171.0                          | 187.0                          | 163.0                          | 187.0                          | 193.5                          |
|                                                                           | <u>-24mo</u><br><u>(n=144)</u> | <u>-12mo</u><br><u>(n=184)</u> | <u>First</u><br><u>dnDSA</u><br><u>(n=340)</u> | <u>+12mo</u><br><u>(n=306)</u> | <u>+24mo</u><br><u>(n=306)</u> | <u>+36mo</u><br><u>(n=306)</u> | <u>+48mo</u><br><u>(n=306)</u> | <u>+60mo</u><br><u>(n=306)</u> |
| <u>MI</u><br><u>(Median values,</u><br><u>mg/g creatinine)</u>            | 174.0                          | 140.0                          | 182.0                                          | 177.2                          | 199.8                          | 299.8                          | 285.1                          | 309.0                          |

| <u>Time (months)</u>                                                      | <u>+72mo</u><br><u>(n=143)</u> | <u>+84mo</u><br><u>(n=117)</u> | <u>+96mo</u><br><u>(n=99)</u>  | <u>+108mo</u><br><u>(n=58)</u>  | <u>+120mo</u><br><u>(n=32)</u>  |
|---------------------------------------------------------------------------|--------------------------------|--------------------------------|--------------------------------|---------------------------------|---------------------------------|
| <u>Observed data</u><br><u>(Median values,</u><br><u>mg/g creatinine)</u> | 187.0                          | 176.0                          | 193.0                          | 252.0                           | 252.0                           |
|                                                                           | <u>+72mo</u><br><u>(n=255)</u> | <u>+84mo</u><br><u>(n=258)</u> | <u>+96mo</u><br><u>(n=260)</u> | <u>+108mo</u><br><u>(n=261)</u> | <u>+120mo</u><br><u>(n=261)</u> |
| <u>LOCF</u><br><u>(Median values,</u><br><u>mg/g creatinine)</u>          | 216.0                          | 232.5                          | 223.5                          | 236.0                           | 258.0                           |
|                                                                           | <u>+72mo</u><br><u>(n=306)</u> | <u>+84mo</u><br><u>(n=306)</u> | <u>+96mo</u><br><u>(n=306)</u> | <u>+108mo</u><br><u>(n=306)</u> | <u>+120mo</u><br><u>(n=306)</u> |
| <u>MI</u><br><u>(Median values,</u><br><u>mg/g creatinine)</u>            | 443.7                          | 545.4                          | 517.9                          | 529.7                           | 448.3                           |
